RESEARCH ARTICLE

# Importance of the Side Chain at Position 296 of Antibody Fc in Interactions with FcγRIIIa and Other Fcγ Receptors

Yuya Isoda<sup>1</sup>, Hirokazu Yagi<sup>2</sup>, Tadashi Satoh<sup>2,3</sup>, Mami Shibata-Koyama<sup>4</sup>, Kazuhiro Masuda<sup>1</sup>, Mitsuo Satoh<sup>4</sup>, Koichi Kato<sup>2,5,6,7</sup>, Shigeru Iida<sup>1\*</sup>

**1** Research Functions Unit, R&D Division, Kyowa Hakko Kirin Co., Ltd, Asahi-machi, Machida-shi, Tokyo, Japan, **2** Graduate School of Pharmaceutical Sciences, Nagoya City University, Tanabe-dori, Mizuho-ku, Nagoya, Japan, **3** JST, PRESTO, Tanabe-dori, Mizuho-ku, Nagoya, Japan, **4** Immunology & Allergy R&D Unit, R&D Division, Kyowa Hakko Kirin Co., Ltd, Asahi-machi, Machida-shi, Tokyo, Japan, **5** Institute for Molecular Science and Okazaki Institute for Integrative Bioscience, National Institutes of Natural Sciences, Higashiyama, Myodaiji, Okazaki, Aichi, Japan, **6** GLYENCE Co., Ltd., Chikusa, Chikusa-ku, Nagoya, Japan, **7** The Glycoscience Institute, Ochanomizu University, Ohtsuka, Bunkyo-ku, Tokyo, Japan

\* [shigeru.iida@kyowa-kirin.co.jp](mailto:shigeru.iida@kyowa-kirin.co.jp)

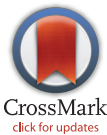

**OPEN ACCESS**

**Citation:** Isoda Y, Yagi H, Satoh T, Shibata-Koyama M, Masuda K, Satoh M, et al. (2015) Importance of the Side Chain at Position 296 of Antibody Fc in Interactions with FcγRIIIa and Other Fcγ Receptors. PLoS ONE 10(10): e0140120. doi:10.1371/journal.pone.0140120

**Editor:** Joseph J Barchi, National Cancer Institute at Frederick, UNITED STATES

**Received:** June 18, 2015

**Accepted:** September 22, 2015

**Published:** October 7, 2015

**Copyright:** © 2015 Isoda et al. This is an open access article distributed under the terms of the [Creative Commons Attribution License](https://creativecommons.org/licenses/by/4.0/), which permits unrestricted use, distribution, and reproduction in any medium, provided the original author and source are credited.

**Data Availability Statement:** The coordinate and structural factors of the crystal structure of the IgG1-Fc-Y296W/shFcγRIIIa complex have been deposited in the Protein Data Bank under accession number 5BW7.

**Funding:** This work was supported in part by JSPS KAKENHI (Grant Numbers 25102008, 24249002 to K.K.), the Program for Promotion of Fundamental Studies in Health Sciences of the National Institute of Biomedical Innovation (NIBIO) (to K.K.), and the Okazaki ORION project. Yuya Isoda, Mami Shibata-Koyama, Kazuhiro Masuda, Mitsuo Satoh, and

## Abstract

Antibody-dependent cellular cytotoxicity (ADCC) is an important effector function determining the clinical efficacy of therapeutic antibodies. Core fucose removal from *N*-glycans on the Fc portion of immunoglobulin G (IgG) improves the binding affinity for Fcγ receptor IIIa (FcγRIIIa) and dramatically enhances ADCC. Our previous structural analyses revealed that Tyr-296 of IgG1-Fc plays a critical role in the interaction with FcγRIIIa, particularly in the enhanced FcγRIIIa binding of nonfucosylated IgG1. However, the importance of the Tyr-296 residue in the antibody in the interaction with various Fcγ receptors has not yet been elucidated. To further clarify the biological importance of this residue, we established comprehensive Tyr-296 mutants as fucosylated and nonfucosylated anti-CD20 IgG1s rituximab variants and examined their binding to recombinant soluble human Fcγ receptors: shFcγRI, shFcγRIIIa, shFcγRIIIa, and shFcγRIIIb. Some of the mutations affected the binding of antibody to not only shFcγRIIIa but also shFcγRIIIa and shFcγRIIIb, suggesting that the Tyr-296 residue in the antibody was also involved in interactions with FcγRIIIa and FcγRIIIb. For FcγRIIIa binding, almost all Tyr-296 variants showed lower binding affinities than the wild-type antibody, irrespective of their core fucosylation, particularly in Y296K and Y296P. Notably, only the Y296W mutant showed improved binding to FcγRIIIa. The 3.00 Å-resolution crystal structure of the nonfucosylated Y296W mutant in complex with shFcγRIIIa harboring two *N*-glycans revealed that the Tyr-to-Trp substitution increased the number of potential contact atoms in the complex, thus improving the binding of the antibody to shFcγRIIIa. The nonfucosylated Y296W mutant retained high ADCC activity, relative to the nonfucosylated wild-type IgG1, and showed greater binding affinity for FcγRIIIa. Our data may improve our understanding of the biological importance of human IgG1-Fc Tyr-296 in interactions with various Fcγ receptors, and have applications in the modulation of the IgG1-Fc function of therapeutic antibodies.

Shigeru Iida are from Kyowa Hakko Kirin Co., Ltd. Koichi Kato is a scientific advisor of Medical & Biological Laboratories Co. Ltd. These funders provided support in the form of salaries for authors (Y.I., M.S., K.M., M.S., S.I., K.K.), but did not have any additional role in the study design, data collection and analysis, decision to publish, or preparation of the manuscript. The specific roles of the authors are articulated in the 'author contributions' section.

**Competing Interests:** Yuya Isoda, Mami Shibata-Koyama, Kazuhiro Masuda, Mitsuo Satoh, and Shigeru Iida are from Kyowa Hakko Kirin Co., Ltd. Koichi Kato is a scientific advisor of Medical & Biological Laboratories Co. Ltd. These do not alter the authors' adherence to PLOS ONE policies on sharing data and materials.

## Introduction

To date, more than 30 monoclonal antibodies have been approved as drugs for the treatment of cancers, chronic diseases, and autoimmune diseases, and over 500 clinical trials investigating the application of monoclonal antibodies are currently ongoing. Within the last few years, several new antibodies have been approved as therapies, such as the anti- $\alpha 4\beta 7$  integrin antibody vedolizumab, which was approved for the treatment of ulcerative colitis and Crohn's disease in the USA in 2014 [1], and the anti-PD-1 antibodies nivolumab and pembrolizumab, which were approved for the treatment of malignant melanomas in Japan and the USA, respectively, in 2014 [2]. Antibody-dependent cellular cytotoxicity (ADCC), a lytic attack on antibody-targeted cells, is triggered by binding of Fc $\gamma$  receptors (Fc $\gamma$ Rs) to the antibody constant region. Some clinical evidence with therapeutic antibodies, such as the anti-CD20 antibody rituximab, the anti-human epidermal growth factor receptor 2 (HER2) antibody trastuzumab, and the anti-epidermal growth factor receptor (EGFR) antibody cetuximab, has revealed that ADCC is one of the key mechanisms determining the clinical efficacy of these antibodies, although these antibodies also exhibit other anticancer functions (*e.g.*, ligand neutralization, induction of apoptosis, and complement dependent cellular cytotoxicity) [3–9]. Human immunoglobulin G (IgG) has two *N*-linked oligosaccharide chains at conserved Asn-297 residues in each of the CH2 domains. The Fc *N*-glycans play an important role in the binding of Fc $\gamma$  receptors and ADCC activity [10–14]. Core fucose removal from the Fc *N*-glycans had been reported to dramatically enhance ADCC activity via improved Fc $\gamma$ RIIIa binding [12, 15–21]. Indeed, a nonfucosylated humanized anti-CC chemokine receptor 4 (CCR4) antibody, mogamulizumab, was approved in Japan in 2012 to treat relapsed/refractory CCR4-positive adult T-cell leukemia-lymphoma [22]. Most recently, obinutuzumab, a nonfucosylated humanized anti-CD20 antibody, also gained approval in the USA for the treatment of previously untreated chronic lymphocytic leukemia (CLL) [23]. Thus, ADCC enhancement technologies have shown clinical benefits in antibody therapeutics, and interest in resolving the mechanisms of mediating the Fc $\gamma$ RIIIa affinity of nonfucosylated antibodies is growing. Recent structural analyses of the IgG1-Fc/shFc $\gamma$ RIIIa complex have revealed that the aromatic ring of Tyr-296 in nonfucosylated antibody is involved in interactions with *N*-glycans at Asn-162 and Lys-128 of Fc $\gamma$ RIIIa through a hydrogen bond and van der Waals contacts [24, 25]. These findings demonstrate the structural importance of IgG1-Fc Tyr-296 in interactions with Fc $\gamma$ RIIIa, particularly for the enhanced binding of nonfucosylated antibodies to Fc $\gamma$ RIIIa. However, a detailed analysis of the importance of the Tyr-296 residue of the antibody in the interactions with various Fc $\gamma$  receptors has not been reported. In this study, comprehensive Tyr-296 mutants were generated in the fucosylated and nonfucosylated forms of anti-CD20 chimeric IgG1s rituximab variants, and their binding affinities were determined for several soluble human activating Fc $\gamma$  receptors, including shFc $\gamma$ RI, shFc $\gamma$ RIIa, shFc $\gamma$ RIIIa, and shFc $\gamma$ RIIIb. Our findings provide new insights into the biological significance of IgG1-Fc Tyr-296 and the potential for modulation of the effector function of therapeutic antibodies.

## Materials and Methods

### Cell lines

CHO/DG44 cells were obtained from Dr. Lawrence Chasin and Gail Urlaub Chasin (Columbia University, New York, NY) [26]. A *FUT8*-knockout CHO/DG44 was established for the production of nonfucosylated antibody, as previously reported [27]. The CD20<sup>+</sup> B lymphoma cell line Raji (CCL-86) was purchased from the American Type Culture Collection (Manassas, VA).

## Blood donors

Blood donors were randomly selected from healthy volunteers registered at Tokyo Research Park (Kyowa Hakko Kirin, Co., Ltd, Tokyo). All donors provided written informed consent before the analyses.

## Construction, expression, and purification of antibodies

Fucosylated and nonfucosylated anti-CD20 chimeric IgG1s with a wild-type Fc region and amino acid substitutions in their Fc regions (Y296G, Y296A, Y296V, Y296L, Y296I, Y296P, Y296M, Y296F, Y296W, Y296S, Y296T, Y296N, Y296Q, Y296C, Y296D, Y296E, Y296H, Y296K, or Y296R; Eu numbering) were prepared as previously described [27, 28]. The cDNA encoding the wild-type Fc region of IgG1 was subcloned into the pBluescript SK (-) phagemid vector (Agilent Technologies, Tokyo). The plasmid was used as the template for polymerase chain reaction (PCR) with the appropriate mutant primers and a Quik-Change Multi Site-Directed Mutagenesis Kit (Stratagene, LaJolla, CA). The cDNA fragments were cloned into antibody expression vectors, and the constructed anti-CD20 antibody expression vectors were introduced into CHO/DG44 or *FUT8*-knockout CHO/DG44 to produce antibodies, as described previously [29]. Production and purification of IgG1s from the culture supernatant were performed as previously reported [27]. The purity of the isolated antibodies was examined by sodium dodecyl sulfate polyacrylamide gel electrophoresis (SDS-PAGE).

## Preparation of hexa-His-tagged recombinant soluble human Fc receptors (shFcγRs)

The shFcγRI, shFcγRIIa-134R, shFcγRIIIa-158V, shFcγRIIIa-158F, and shFcγRIIIb were prepared as described previously [17, 30–32]. For all shFcγRs, the transmembrane and intracellular domains were replaced by a hexa-His tag. The concentrations of purified proteins were measured by determining the absorbance at 280 nm, and their purities and molecular weights were confirmed by SDS-PAGE.

Bis-*N*-glycosylated shFcγRIIIa bearing oligosaccharides at both Asn-45 and Asn-162 was prepared by Asn-to-Gln mutation of the other three glycosylation sites (Asn-38, -74, and -169), as described previously [31], and was used for X-ray structural analysis.

## Analyses of antibody-derived *N*-linked oligosaccharides

For the glycosylation analyses, the isolated antibodies were boiled with SDS and 2-mercaptoethanol at 96°C for 3 min and digested by recombinant peptide-*N*-glycosidase F (PNGase F; Sigma-Aldrich, St. Louis, MO) with 5% Triton X-100 (Sigma-Aldrich).

The Fc *N*-linked oligosaccharides were prepared by digestion with recombinant peptide-*N*-glycosidase F (PNGase F; Sigma-Aldrich) and analyzed by matrix-assisted laser desorption/ionization time-of-flight mass spectrometry (MALDI-TOF MS) in the positive-ion mode, as described previously [30].

## Antibody binding to shFcγRs

The binding kinetics of chimeric anti-CD20 mutant antibodies for each shFcγR (shFcγRI, shFcγRIIa, shFcγRIIIa-158V, shFcγRIIIa-158F, and shFcγRIIIb) were analyzed by surface plasmon resonance (SPR) measurement using a T100 biosensor instrument and CM5 sensor chips (BIAcore; GE Healthcare, Pittsburgh, PA), as described previously [24]. Briefly, assays were performed with anti-tetra-His antibody-immobilized CM5 sensor chips using an Amine Coupling Kit (BIAcore). The individual hexa-His-tagged shFcγRs were captured by the

immobilized anti-tetra-His antibodies at a flow rate of 5  $\mu\text{L}/\text{min}$ . Antibodies were diluted in HBS-EP+ Buffer (BIAcore) at various concentrations (for shFc $\gamma$ RI and shFc $\gamma$ RIIIa-158V: from 4 to 267 nM; for shFc $\gamma$ RIIa, shFc $\gamma$ RIIIa-158F, and shFc $\gamma$ RIIIb: from 8 to 534 nM), and each diluted antibody was injected into the shFc $\gamma$ Rs-coated sensor chip at a flow rate of 30  $\mu\text{L}/\text{min}$ . The experiments were performed with HBS-EP+ as the running buffer at 25°C. The shFc $\gamma$ Rs and antibodies bound to the sensor surface were removed by injecting 10 mM HCl. The data obtained by the injection of antibodies were corrected for the blank control prior to data analysis. The dissociation constant ( $K_D$ ) for each shFc $\gamma$ R was calculated by steady-state analysis using BIAcore T100 kinetic evaluation software (BIAcore).

### Antigen binding analysis

The antigen binding of anti-CD20 IgG1 rituximab variants to the CD20<sup>+</sup> B lymphoma cell line Raji was measured by flow cytometry. Raji cells ( $5 \times 10^5$  cells) were stained with 100  $\mu\text{g}/\text{mL}$  of anti-CD20 IgG1 variants at 4°C for 30 min. Fluorescein isothiocyanate (FITC)-conjugated anti-human IgG (H+L) (R&D Systems, Minneapolis, MN) was used as the secondary reagent to detect cell-bound anti-CD20 IgG1 variants. The stained cells were analyzed using a BD FACSCanto II (BD Biosciences, San Jose, CA) [19].

### ADCC assay

The ADCC activity of anti-CD20 IgG1 rituximab variants was measured using the lactate dehydrogenase (LDH) release assay, described previously [33]. Human peripheral blood mononuclear cells (PBMCs) prepared from healthy donors using Lymphoprep (Axis Shield, Dundee) were used as effector cells, and Raji cells were used as target cells. The assays were conducted at an effector/target ratio of 25/1 in the presence of antibodies.

### Crystallization, X-ray data collection and structure determination of the nonfucosylated IgG1-Fc-Y296W mutant in complex with shFc $\gamma$ RIIIa

A binary complex formed between the nonfucosylated IgG1-Fc fragment with a Y296W mutation and bis-*N*-glycosylated shFc $\gamma$ RIIIa was purified by size-exclusion chromatography (Superose 12; GE Healthcare), as previously described [24]. The IgG1-Fc-Y296W/shFc $\gamma$ RIIIa complex (10 mg/mL) was crystallized in a buffer containing 12% PEG20,000, 0.1 M MES (pH 6.5), and 1% Zwittergent 3-08 (Hampton Research) using a sitting drop vapor diffusion method at 20°C. The obtained crystal was cryoprotected through soaking with a crystallization mother liquor containing 5–15% glycerol in a gradual manner (three steps with 3-min intervals). The diffraction dataset was collected using synchrotron radiation at NW12A of the Photon Factory (Tsukuba) and processed using HKL2000 software [34]. The crystal parameters of the binary complex are shown in Table 1.

The 3.00 Å-resolution crystal structure of IgG1-Fc-Y296W/shFc $\gamma$ RIIIa was solved by the molecular replacement method using the program MOLREP [35] with the crystal structure of wild-type IgG1-Fc complexed with shFc $\gamma$ RIIIa (PDB code: 3AY4) as a search model. Model building and refinement were conducted using COOT [36] and REFMAC5 [37], respectively. The stereochemical quality of the final model was evaluated using RAMPAGE [38]. The refinement statistics are summarized in Table 1. The molecular graphics were created using PyMOL (<http://www.pymol.org/>).

**Table 1. Data collection and refinement statistics for the IgG1-Fc-Y296W/shFcγRIIIa complex.**

| Parameter                                               | IgG1-Fc- Y296W/shFcγRIIIa                |
|---------------------------------------------------------|------------------------------------------|
| <b>Crystallographic data</b>                            |                                          |
| Space group                                             | <i>P</i> 4 <sub>1</sub> 2 <sub>1</sub> 2 |
| Unit cell <i>a</i> / <i>b</i> / <i>c</i> (Å)            | 77.3 / 77.3 / 351.0                      |
| <b>Data processing statistics</b>                       |                                          |
| Beam line                                               | PF-AR NW12A                              |
| Wavelength (Å)                                          | 1.00000                                  |
| Resolution (Å)                                          | 50–2.90 (2.95–2.90)                      |
| Total/unique reflections                                | 164,773 / 24,829                         |
| Completeness (%)                                        | 98.4 (100.0)                             |
| <i>R</i> <sub>merge</sub> (%)                           | 9.2 (49.6)                               |
| <i>I</i> / $\sigma$ ( <i>I</i> )                        | 30.8 (4.6)                               |
| <b>Refinement statistics</b>                            |                                          |
| Resolution (Å)                                          | 20.0–3.00                                |
| <i>R</i> <sub>work</sub> / <i>R</i> <sub>free</sub> (%) | 20.4 / 25.0                              |
| Number of non-hydrogen atoms                            |                                          |
| Protein [Fc(A) / Fc(B) / FcR(C)]                        | 1695 / 1714 / 1268                       |
| Water                                                   | 26                                       |
| Sugar [Fc(A) / Fc(B) / FcR(C)]                          | 100 / 89 / 149                           |
| R.M.S. deviations from ideal                            |                                          |
| Bond lengths (Å)                                        | 0.011                                    |
| Bond angles (°)                                         | 1.57                                     |
| Ramachandran plot (%)                                   |                                          |
| Favored                                                 | 96.0                                     |
| Allowed                                                 | 4.0                                      |
| Disallowed                                              | 0                                        |
| Average <i>B</i> -factors (all atoms, Å <sup>2</sup> )  |                                          |
| Protein [Fc(A) / Fc(B) / FcR(C)]                        | 61.1 / 53.0 / 75.3                       |
| Water                                                   | 46.2                                     |
| Sugar [Fc(A) / Fc(B) / FcR(C)]                          | 74.8 / 67.4 / 103.1                      |

doi:10.1371/journal.pone.0140120.t001

## Results

### Generation of fucosylated and nonfucosylated anti-CD20 IgG1 variants

Serial mutants of the anti-CD20 chimeric IgG1 rituximab with amino acid substitutions in their Fc Tyr-296 residues were generated in fucosylated and nonfucosylated forms. In the purified Y296P mutant, two bands of the heavy chain were detected by reducing SDS-PAGE (Fig 1, lane 6, bands 1 and, 2). Band 2 was the major component and had a slightly lower molecular weight than band 1. PNGase F digestion revealed that the upper band of SDS-PAGE contained the *N*-glycan-deleted form (S1 Fig). Other anti-CD20 IgG1 variants showed the expected band sizes without any differences among them, although all variants showed some minor bands under nonreduced conditions (Fig 1, lanes 1–5 and 7–19). The fucose residue in the Fc *N*-glycans of anti-CD20 IgG1 variants was not detected in *FUT8*-knockout CHO/DG44-produced antibodies (Table 2). Unexpectedly, the oligosaccharide of the nonfucosylated Y296P variant could not be detected. In the CHO/DG44-produced antibodies, more than 97% of Fc *N*-glycans were fucosylated, with the exception of the Y296P variant bearing 16% high-mannose type Fc oligosaccharides.

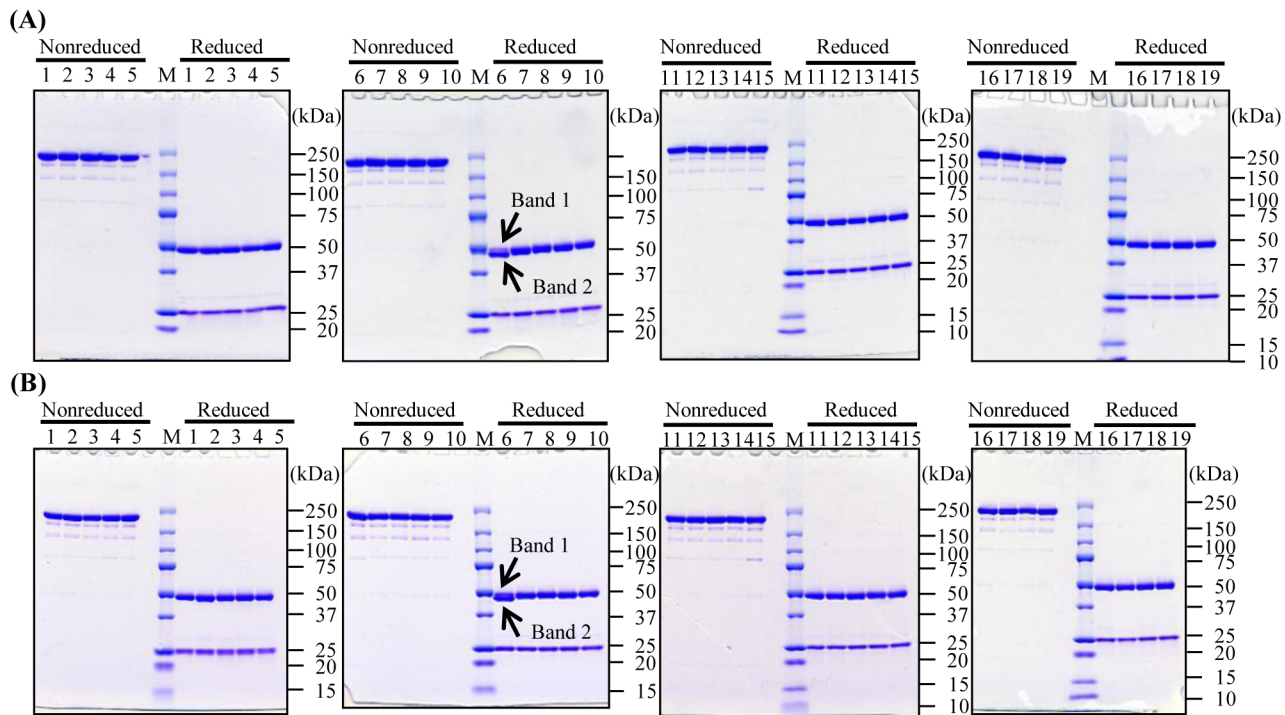

**Fig 1. SDS-PAGE of the purified anti-CD20 IgG1 rituximab variants.** The purified fucosylated (A) and nonfucosylated (B) anti-CD20 IgG1 variants were subjected to nonreducing and reducing 5–20% SDS-PAGE analyses. Lane M: molecular mass marker, lane 1: Y296G, lane 2: Y296E, lane 3: Y296L, lane 4: Y296F, lane 5: Y296D, lane 6: Y296P, lane 7: Y296H, lane 8: Y296W, lane 9: Y296S, lane 10: Y296R, lane 11: Y296N, lane 12: Y296V, lane 13: Y296A, lane 14: Y296I, lane 15: Y296C, lane 16: Y296T, lane 17: Y296K, lane 18: Y296M, and lane 19: Y296Q.

doi:10.1371/journal.pone.0140120.g001

### FcγR binding profiles of anti-CD20 IgG1 variants

The binding kinetics of the anti-CD20 IgG1 variants to shFcγRI, shFcγRIIa, shFcγRIIIa-158V, shFcγRIIIa-158F, and shFcγRIIIb were estimated by surface plasmon resonance (SPR) measurement. Almost all nonfucosylated and fucosylated antibodies with the Tyr-296 mutation exhibited lower binding affinities for shFcγRIIIa-158V and shFcγRIIIa-158F than the wild-type antibody (Fig 2A–2D). In particular, Y296K and Y296P mutations significantly decreased the binding affinity of the nonfucosylated antibody for shFcγRIIIa compared with that of the fucosylated wild-type antibody. A relatively large loss of affinity was observed for Y296R, Y296G and Y296A mutants. On the other hand, only the Y296W mutant showed higher binding affinity for shFcγRIIIa than the parental antibody. The affinities of the fucosylated Y296W mutant for shFcγRIIIa-158V and -158F were increased by 1.93- and 2.20-fold, respectively, compared with that of the fucosylated wild-type antibody (fucosylated wild-type antibody:  $25.7 \pm 2.2 \times 10^{-8}$  M versus fucosylated Y296W:  $13.3 \pm 1.8 \times 10^{-8}$  M; fucosylated wild-type:  $165 \pm 3.7 \times 10^{-8}$  M versus fucosylated Y296W:  $74.9 \pm 0.96 \times 10^{-8}$  M, respectively) and the nonfucosylated Y296W mutant showed 1.46- and 1.36-fold lower  $K_D$  values for shFcγRIIIa-158V and -158F, respectively, than nonfucosylated wild-type antibody (nonfucosylated wild-type antibodies:  $7.61 \pm 0.44 \times 10^{-8}$  M versus nonfucosylated Y296W:  $5.23 \pm 0.17 \times 10^{-8}$  M; nonfucosylated wild-type antibodies:  $49.9 \pm 1.24 \times 10^{-8}$  M versus nonfucosylated Y296W:  $36.6 \pm 0.95 \times 10^{-8}$  M, respectively; Table 3). For the binding of shFcγRIIIb with nonfucosylated variants, only the Y296W mutant retained a high affinity comparable to that of the wild-type antibody, and a marked loss of affinity was observed with the Tyr-296 mutation in comparison with its fucosylated counterpart (Fig 2E and 2F). In the binding of shFcγRIIa, fucosylated Tyr-

**Table 2. Oligosaccharide analysis of anti-CD20 IgG1 rituximab variants.**

| Sample | Relative composition of oligosaccharides (%) |       |       |       |                      |       |       |       |
|--------|----------------------------------------------|-------|-------|-------|----------------------|-------|-------|-------|
|        | Nonfucosylated antibody                      |       |       |       | Fucosylated antibody |       |       |       |
|        | High-Man                                     | Fu(-) | Fu(+) | Total | High-Man             | Fu(-) | Fu(+) | Total |
| Wild   |                                              | 100   |       | 100   |                      | 2     | 98    | 100   |
| Y296G  |                                              | 100   |       | 100   |                      |       | 100   | 100   |
| Y296E  |                                              | 100   |       | 100   |                      | 3     | 97    | 100   |
| Y296F  |                                              | 100   |       | 100   |                      |       | 100   | 100   |
| Y296P  |                                              |       |       | N.D.  | 16                   |       | 84    | 100   |
| Y296H  |                                              | 100   |       | 100   |                      | 2     | 98    | 100   |
| Y296W  |                                              | 100   |       | 100   |                      | 2     | 98    | 100   |
| Y296R  | 3                                            | 97    |       | 100   |                      | 3     | 97    | 100   |
| Y296A  | 5                                            | 95    |       | 100   |                      | 3     | 97    | 100   |
| Y296K  | 5                                            | 95    |       | 100   | 2                    | 3     | 95    | 100   |
| Y296Q  | 3                                            | 97    |       | 100   |                      | 2     | 98    | 100   |
| Y296L  | 3                                            | 97    |       | 100   |                      |       | 97    | 100   |
| Y296D  |                                              | 100   |       | 100   |                      |       | 100   | 100   |
| Y296S  |                                              | 100   |       | 100   |                      | 2     | 98    | 100   |
| Y296N  |                                              | 100   |       | 100   |                      |       | 100   | 100   |
| Y296V  |                                              | 100   |       | 100   |                      |       | 100   | 100   |
| Y296I  | 2                                            | 98    |       | 100   |                      | 3     | 97    | 100   |
| Y296C  | 2                                            | 98    |       | 100   |                      |       | 100   | 100   |
| Y296T  |                                              | 100   |       | 100   |                      |       | 100   | 100   |
| Y296M  |                                              | 100   |       | 100   |                      |       | 100   | 100   |

Each composition value is the relative amount of total complex-type oligosaccharides detected.

Fu(+): fucosylated complex-type sugar chains, Fu(-): nonfucosylated complex-type sugar chains, High-Man: high-mannose-type sugar chains, N.D.: not detected.

doi:10.1371/journal.pone.0140120.t002

296 mutants, except for Y296P, showed greater affinity than fucosylated wild-type antibody. Y296W had the highest affinity among the tested fucosylated and nonfucosylated variants (Fig 2G and 2H). In contrast, shFcγRI binding was generally not affected by the Tyr-296 mutation, although the Y296P mutant exhibited an affinity that was several times lower than that of the wild-type antibody (Fig 2I and 2J).

### ADCC of anti-CD20 IgG1 mutants

To evaluate the influence of IgG1-Fc Tyr-296 mutations on the ADCC of the anti-CD20 IgG1 rituximab, the *in vitro* ADCC activities against Raji cells were measured using human peripheral blood mononuclear cells (PBMC) from two healthy donors as effector cells. Y296W, Y296K, and Y296A were selected as typical mutants, which showed the higher or dramatically lower affinity to the FcγRIIIa than wild-type. Flow cytometric analysis using Raji cells revealed that these antibody variants retained CD20 binding activity equal to that of the wild-type antibody (S2 Fig). The ADCC activities of antibodies were detected in both donors, although there was large variability between donor 1 and donor 2, which may have been related to differences in the *FCGR3A* genotype.

Irrespective of core fucosylation, the Y296A and Y296K mutants showed lower ADCC activities than the wild-type antibody (Fig 3), in the same order of their binding affinity to

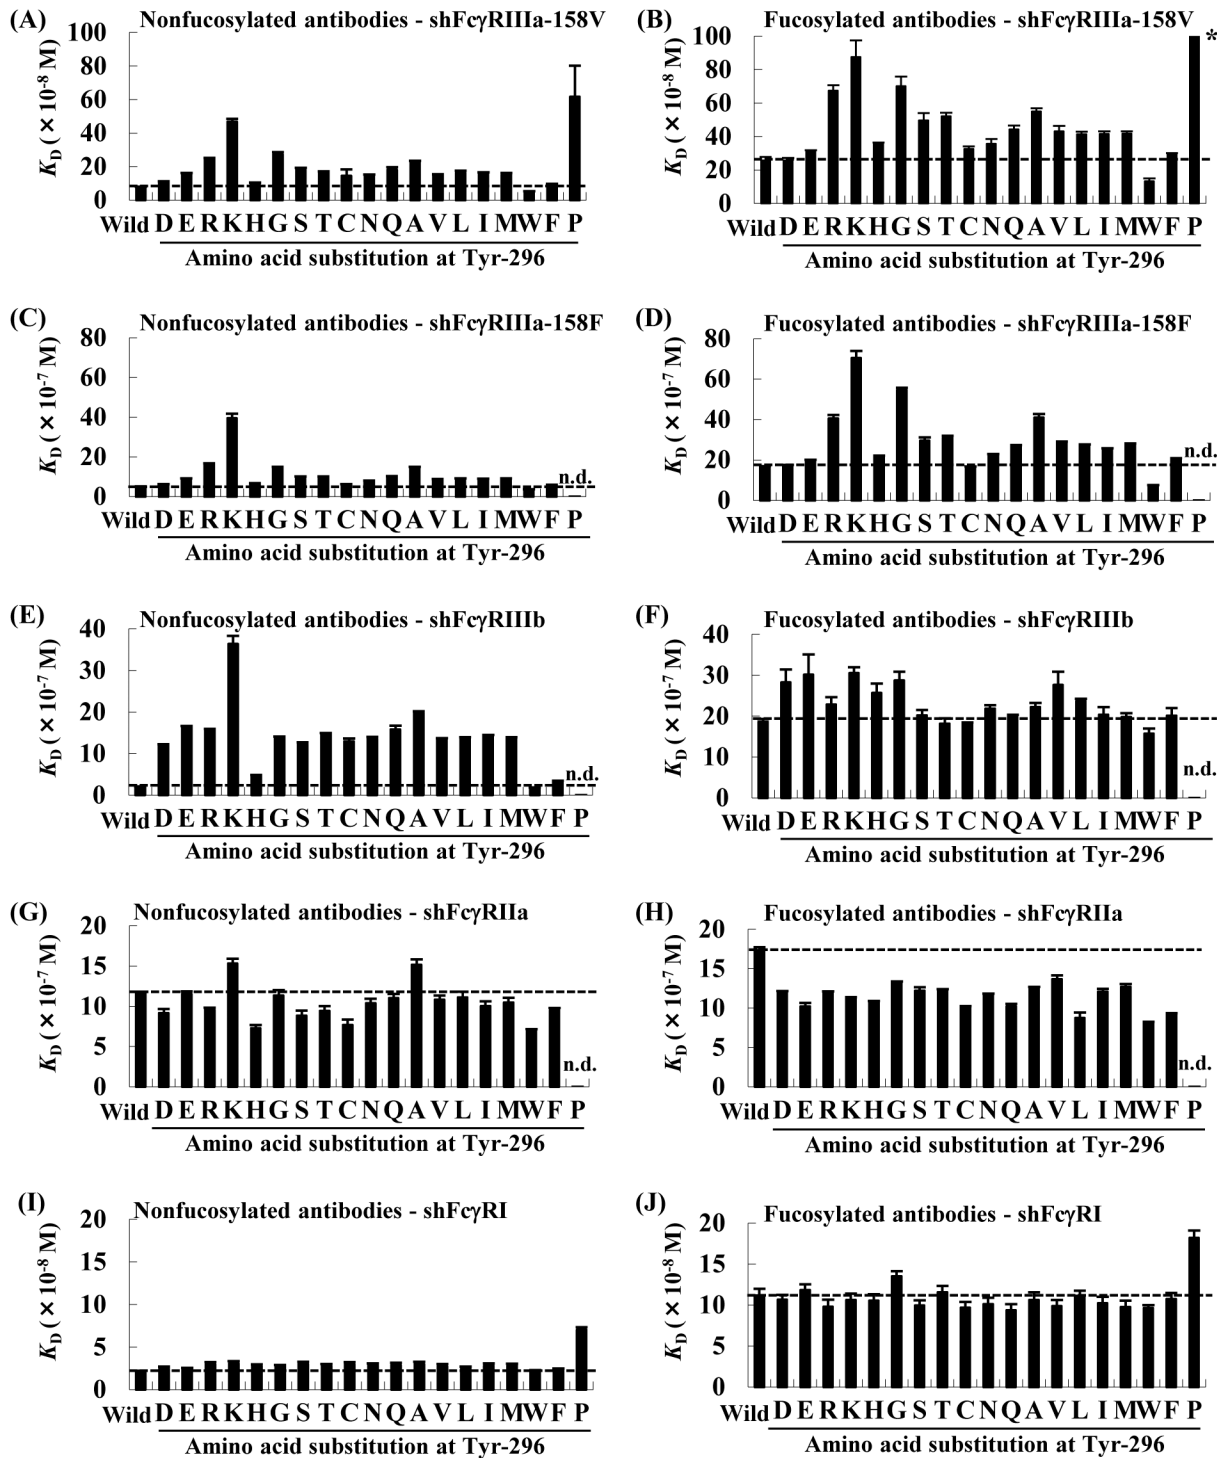

**Fig 2. Binding affinities of anti-CD20 IgG1 rituximab variants for shFcRIIIa (V), shFcRIIIa (F), shFcRIIIb, shFcRIIIa, and shFcRI.** Binding affinities of the nonfucosylated antibodies (A, C, E, G, I) and fucosylated antibodies (B, D, F, H, J) for shFcRIIIa (V), shFcRIIIa (F), shFcRIIIb, shFcRIIIa, and shFcRI were determined using Surface Plasmon Resonance (SPR) measurement. The mean  $K_D$  value ( $n = 3$ ) is indicated on the Y axis; bars  $\pm$  standard deviations (SDs). Dashed lines indicate the  $K_D$  value of the wild-type antibodies. \*, the  $K_D$  value of Y296P was more than  $100 \times 10^{-8}$  M. n.d., not detected.

doi:10.1371/journal.pone.0140120.g002



**Table 3. Binding affinities of anti-CD20 IgG1 rituximab variants to shFcγRs.**

| Average $K_D$<br>( $\times 10^{-8}$ M)<br>( $K_D$ wild = 1) | Wild-type          |                    | Y296W                 |                       | Y296A                 |                       | Y296K                 |                       |
|-------------------------------------------------------------|--------------------|--------------------|-----------------------|-----------------------|-----------------------|-----------------------|-----------------------|-----------------------|
|                                                             | Fu(+)              | Fu(-)              | Fu(+)                 | Fu(-)                 | Fu(+)                 | Fu(-)                 | Fu(+)                 | Fu(-)                 |
| FcγRIIIa(V)                                                 | 25.7 ± 2.2<br>(1)  | 7.61 ± 0.44<br>(1) | 13.3 ± 1.8<br>(1.93)  | 5.23 ± 0.17<br>(1.46) | 54.9 ± 2.0<br>(0.47)  | 22.9 ± 0.59<br>(0.33) | 87.6 ± 9.9<br>(0.29)  | 46.8 ± 1.6<br>(0.16)  |
| FcγRIIIa(F)                                                 | 165 ± 3.7 (1)      | 49.9 ± 1.2<br>(1)  | 74.9 ± 0.96<br>(2.2)  | 36.6 ± 0.95<br>(1.36) | 411 ± 17 (0.4)        | 146 ± 3.6<br>(0.34)   | 704 ± 36<br>(0.23)    | 395 ± 23<br>(0.13)    |
| FcγRIIIb                                                    | 187 ± 6.7 (1)      | 20.2 ± 0.39<br>(1) | 157 ± 13<br>(1.19)    | 17.9 ± 0.41<br>(1.13) | 222 ± 11<br>(0.84)    | 198 ± 3.6 (0.1)       | 305 ± 14<br>(0.61)    | 364 ± 19<br>(0.06)    |
| FcγRIIIa                                                    | 174 ± 3.4 (1)      | 116 ± 2.0 (1)      | 81.5 ± 0.98<br>(2.13) | 69.2 ± 2.3<br>(1.68)  | 126 ± 1.2<br>(1.39)   | 151 ± 6.87<br>(0.77)  | 113 ± 1.2<br>(1.54)   | 153 ± 5.9<br>(0.76)   |
| FcγRI                                                       | 11.2 ± 0.81<br>(1) | 10.4 ± 0.34<br>(1) | 9.67 ± 0.34<br>(1.16) | 8.1 ± 0.66<br>(1.28)  | 10.6 ± 0.93<br>(1.05) | 10.1 ± 0.74<br>(1.03) | 10.6 ± 0.78<br>(1.06) | 10.5 ± 0.84<br>(0.99) |

The values in parentheses indicated fold changes relative to wild-type. The mean  $K_D$  value ( $n = 3$ ) is indicated on the Y axis; bars ± standard deviations (SDs). Fu(+): fucosylated; Fu(-): nonfucosylated.

doi:10.1371/journal.pone.0140120.t003

shFcγRIIIa (wild type > Y296A > Y296K; Table 3). The Y296W mutant having improved binding affinity to shFcRIIIa exhibited almost the same ADCC activity as the wild-type antibody (Fig 3).

### Structure of the nonfucosylated IgG1-Fc-Y296W mutant complexed with shFcγRIIIa

In order to understand the structural basis for the improved binding affinity due to the Tyr-to-Trp substitution at position 296 of the Fc portion, we determined the 3.00-Å-resolution crystal structure of the nonfucosylated IgG1-Fc Y296W mutant in complex with shFcγRIIIa harboring two *N*-glycosylations at Asn-45 and Asn-162 [31]. The overall structure of the mutated Fc/shFcγRIIIa complex was essentially identical to the previously reported crystal structures of the wild-type Fc complexed with the bis-*N*-glycosylated shFcγRIIIa mutant (RMSD = 0.21 Å for 581 Cα atoms; Fig 4A) [24, 25]. In the complex, the *N*-linked glycans displayed on both molecules exhibited well-defined electron densities (S3 Fig), showing unique carbohydrate-carbohydrate interactions between IgG1-Fc and shFcγRIIIa as previously described [24, 25].

In the interaction interface, the indole ring of the Trp-296 of Fc chain A was flipped out and made van der Waals contacts with Lys-128 and Man-4 of the Asn-162 *N*-glycan of shFcγRIIIa, as observed in the wild-type Fc (Tyr-296) complex (Fig 4B). Expectedly, the number of potential contact atoms in the complex with the Y296W mutant (indole group) is increased as compared with the wild-type counterpart (phenol group), thus contributing to the improved receptor-binding affinity of the Fc mutant.

### Discussion

Glycosylation of FcγRs is known to influence the affinities of these molecules for antibodies, and removal of core fucoses from *N*-linked oligosaccharides in the IgG1-Fc region can increase FcγRIIIa binding and dramatically enhance ADCC activity [12, 15–21]. In a previous study, we solved the structure of the complex formed between nonfucosylated IgG1-Fc and shFcγRIIIa with a minimal two *N*-glycans at Asn-45 and Asn-162 and showed that the Asn-162 *N*-glycan of shFcγRIIIa mediates the interaction with nonfucosylated Fc, thereby stabilizing the complex [24]. As for the glycoforms of FcγRIIIa, cell type-specific variation has been reported [39]. The

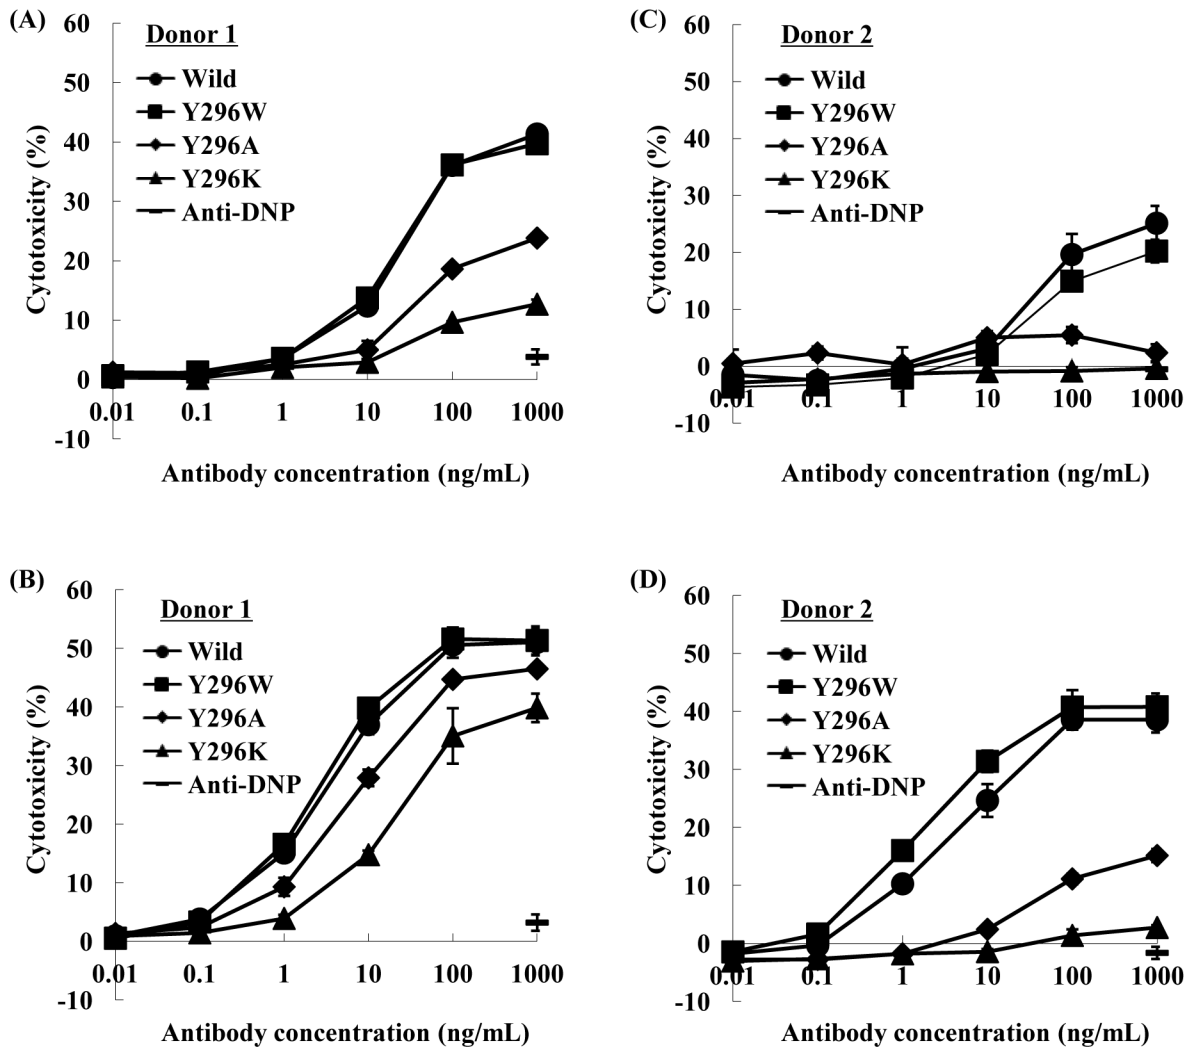

**Fig 3. ADCC activity of anti-CD20 IgG1 variants.** ADCC activities of anti-CD20 IgG1 rituximab fucosylated (A, C) or nonfucosylated (B, D) variants (WT: closed circle, Y296W: closed square, Y296A: closed diamond shape, Y296K: closed triangle, anti DNP antibody: bar) were measured by the LDH release method using CD20<sup>+</sup> B-cell lymphoma cell line Raji cells as target cells and human PBMCs from two healthy donors (donors 1 [A, B] and donor 2 [C, D]) as effector cells at an E/T ratio of 20/1.

doi:10.1371/journal.pone.0140120.g003

recombinant FcγRIIIa used in this study was produced by CHO cells, and their glycoforms at Asn-162 were confirmed to have N-linked complex-type glycoforms [31]. Recently, Kawasaki et al. [40] reported the site-specific classification of N-linked oligosaccharides attached to the extracellular region of FcγRIIIb expressed in baby hamster kidney cells and identified their glycoforms as only complex-type at Asn-38, Asn-74, Asn-162, and Asn-169 and complex-type or high-mannose-type at Asn-45 and Asn-64. Taken together, these findings suggested that recombinant FcγRIIIa and FcγRIIIb produced by different cell lines have complex-type oligosaccharides as the major glycoforms at Asn-162. The Fc region and shFcγRIIIa have two binding modes depending on the orientation of the aromatic ring of the Tyr-296 residue of the Fc chain A. Core fucose depletion increases the occurrence of the active conformation of Tyr-296, thereby accelerating the formation of the high-affinity complex. Thus, Tyr-296 of the IgG1-Fc region plays an important role in interactions with shFcγRIIIa and enhancement of the binding affinity of nonfucosylated antibody for shFcγRIIIa. However, detailed analyses of

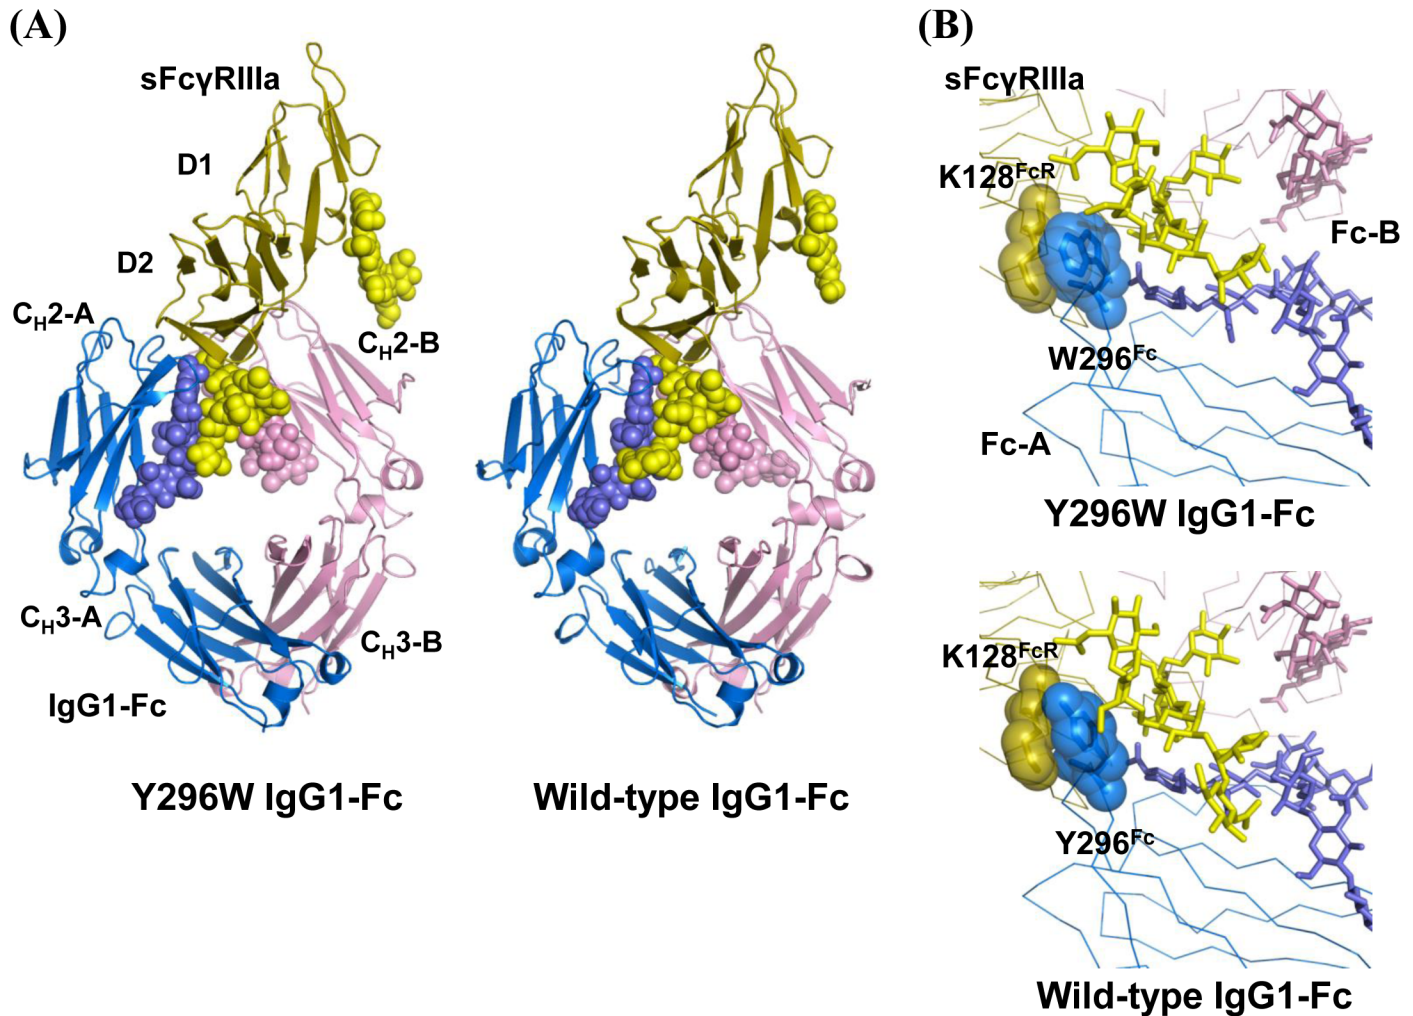

**Fig 4. Structure of IgG1-Fc-Y296W complexed with sFc $\gamma$ RIIIa.** (A) Overall structures of nonfucosylated Fc fragments in a complex with the bis-*N*-glycosylated soluble form of Fc $\gamma$  receptor IIIa (sFc $\gamma$ RIIIa): left, Y296W Fc; right, wild-type Fc (PDB code: 3AY4). Chains A and B of the Fc fragment and sFc $\gamma$ RIIIa are colored marine, pink, and yellow, respectively. Carbohydrate residues are represented as spheres. (B) Close-up view of the interaction interface between Fc and sFc $\gamma$ RIIIa: upper, Y296W Fc; lower, wild-type Fc (PDB code: 3AY4). Carbohydrate residues are represented as sticks, and Lys-128 of sFc $\gamma$ RIIIa and Trp/Tyr-296 of Fc are represented as transparent spheres.

doi:10.1371/journal.pone.0140120.g004

comprehensive Tyr-296 mutants with a focus on the structural and functional importance of the Tyr-296 position in interactions with Fc $\gamma$ RIIIa and other Fc $\gamma$  receptors have not been reported. Our comprehensive binding analysis of Fc Tyr-296 mutants revealed in detail that Tyr-296 affected the binding of IgG1-Fc to not only Fc $\gamma$ RIIIa but also Fc $\gamma$ RIIIa and Fc $\gamma$ RIIIb.

IgG1-Fc Tyr-296 is located next to Asn-297, where the *N*-linked glycan is attached. *N*-glycosylation via oligosaccharyltransferase is known to be controlled by the specific conformation of the Asn residue within the consensus sequence Asn-X-Ser/Thr (where X is not Pro). Therefore, it was hypothesized that the amino acid substitution of Fc Tyr-296 in this study may somewhat affect Fc *N*-glycosylation. Indeed, Tyr to Pro substitutions resulted in a deglycosylated Fc and immature high-mannose type Fc oligosaccharides, possibly due to the restrained backbone conformation of Pro, which inhibits the access of oligosaccharyltransferase to Asn-297. These inhibitory effects of the adjacent proline on the *N*-linked glycosylation of the recombinant protein have also been reported in the production of recombinant human

erythropoietin [41]. Importantly, the *N*-glycans at Asn-297 are crucial for Fc binding of FcγRs [10, 13, 14, 42] and are required for eliciting ADCC [11, 43]. In this study, insufficient *N*-glycosylation of Y296P also resulted in the marked reduction of binding to Fcγ receptors.

In contrast to Y296P, other Tyr-296 mutants showed binding affinity for Fcγ receptors. Notably, only the Y296W mutant showed increased binding affinity for FcγRIIIa through the additional  $\Pi$ -cation and  $\Pi$ -CH interactions via the indole group of Trp as compared with the binding affinity of the wild-type antibody. However, fucosylated Y296W never achieved the binding affinity of FcγRIIIa or ADCC activity of the nonfucosylated wild-type antibody. The ADCC activity of the nonfucosylated Y296W mutant was almost identical to that of nonfucosylated wild-type, as in the case of nonfucosylated IgG1s harboring triple Fc amino acid mutations that enable enhanced the binding to FcγRIIIa [33]. The ADCC and SPR assay results varied for fucosylated wild-type antibodies and the Y296W mutant. Although fucosylated Y296W improved the affinity for FcγRIIIa as compared with that of the fucosylated wild-type antibody, this mutant had almost the same ADCC activity as the fucosylated wild-type antibody. This may be explained by differences in FcγRIIIa binding kinetics of these antibodies. Masuda et al. (2007) revealed that  $k_{\text{ass}}$  but not  $k_{\text{dis}}$  of the antibody for FcγRIIIa binding is critical for enhancing ADCC activity [33]. In our experiment, the affinity was calculated as dissociation constant ( $K_D$ ) by steady-state analysis. Therefore, it is possible that fucosylated Y296W may improve  $k_{\text{dis}}$  rather than  $k_{\text{ass}}$ . These results indicated that the enhanced FcγRIIIa binding of Y296W alone did not lead to ADCC improvement for wild-type IgG1 and that removal of the core fucose from Fc oligosaccharides was sufficient for maximizing the ADCC activity of IgG1.

In the interaction between Fc and FcγRIIIa, Tyr-296 forms a hydrogen bond and van der Waals contacts with the Asn-162 *N*-glycan and Lys-128 of FcγRIIIa, although the interactions are inhibited by the intramolecular contacts of Fc core fucose residues with the Tyr-296 tyrosine ring [24]. In this study, the fucosylated mutants, Y296A, Y296G, Y296K, and Y296R exhibited markedly reduced FcγRIIIa binding, and Y296A and Y296K showed diminished ADCC activity. Ala and Gly are fundamental amino acid residues whose side chains include only hydrogen or a methyl group, whereas Arg and Lys are basic amino acid residues with a positive charge. These characteristics of the amino acid residues may influence the contacts with the Asn-162 *N*-glycan or Lys-128 of FcγRIIIa, and reduce the affinity of Fc for FcγRIIIa. The same trends were also observed in the nonfucosylated counterparts; however, removal of the Fc core fucose markedly restored the ADCC of Y296A and Y296K mutants, possibly through the interaction between the Asn-162 *N*-glycan of FcγRIIIa and nonfucosylated Fc *N*-glycan [24, 25]. These findings suggested that each interaction with Fc Tyr-296 and the carbohydrate-carbohydrate contacts independently contributes to the high affinity of nonfucosylated IgG1 for FcγRIIIa and that carbohydrate-carbohydrate interactions can function even in the Fc exhibiting reduced FcγRIIIa binding because of the Tyr-296 mutation. Notably, the Tyr-296 mutants substituted with amino acid residues having aromatic rings showed improved or comparable binding affinities for FcγRIIIa as compared with that of the wild-type antibody. The Tyr to Phe mutation Y296F is known to be present in human IgG2, IgG3, and IgG4 subclasses, and Niwa et al. (2005) revealed that core fucose removal from IgG2/3/4 Fc-oligosaccharides can enhance the ADCC activity of these antibodies in a subclass-independent manner [19]. In this study, fucose depletion from the Fc-oligosaccharide of the Y296F mutant enhanced FcγRIIIa binding, as observed in wild-type Fc-Tyr-296. Therefore, IgG2/3/4-Fc Phe-296 was considered a key amino acid residue, corresponding to the IgG1-Fc Tyr-296, in the enhanced binding of nonfucosylated IgG2/3/4 to FcγRIIIa. Further analysis of IgG allotypes with amino acid variations at position 296, such as G3m14 (either Tyr-296 or Phe-296) and G3m15 (Tyr-296), will provide insights into the biological significance of Phe-296 on the ADCC and other biological activities of IgG subclasses. The binding profiles of the Tyr-296 mutants for FcγRIIIb

were similar to the binding profiles for Fc $\gamma$ RIIIa, including the high binding affinity of the Y296W mutant. In contrast to Fc $\gamma$ RIIIa binding, the nonfucosylated form showed a larger fold-decrease in affinity due to the amino acid substitution than its fucosylated counterpart. These findings suggested that the Fc 296 position was more important for the binding of non-fucosylated IgG1 to Fc $\gamma$ RIIIb than for the binding of fucosylated IgG1.

The effects of the Tyr-296 mutation on the binding of Fc $\gamma$ RI and Fc $\gamma$ RIIIa were different from those observed for Fc $\gamma$ RIIIa. For Fc $\gamma$ RI, unlike Fc $\gamma$ RIIIa, only the amino acid substitution of Pro at the Tyr-296 position affected the interaction between the antibody and Fc $\gamma$ RI. Fc $\gamma$ RI has been reported to be a high-affinity receptor, and the FG-loop with its conserved one-residue deletion is critical for this high affinity [44]. Taken together with the results of this study, these findings suggested that the FG-loop may be the main contributor to the interactions between IgG1 and Fc $\gamma$ RI.

Fc $\gamma$ RIIIa lacks an *N*-glycan corresponding to the Asn-162 of Fc $\gamma$ RIIIa, and does not form *N*-glycan (Asn-64, Asn-145)-mediated interactions with IgG1-Fc [45]. The core fucose of the Fc oligosaccharide is believed to be closely apposed to the interaction sites between Fc and Fc $\gamma$ RIIIa-HR, comprising Lys-128 and Ser-129 of Fc, and Phe-132 and Arg-134 of the receptor. Removal of the fucose from the IgG1-Fc oligosaccharide has been shown to slightly increase binding to Fc $\gamma$ RIIIa-HR [46], which was also reproduced in this study (Table 3). As in the case of Fc $\gamma$ RIIIa, Fc $\gamma$ RIIIa binding was reduced by Y296A and Y296K and improved by Y296W in the nonfucosylated form. However, the effects of these mutations on Fc $\gamma$ RIIIa binding were not as remarkable as those for Fc $\gamma$ RIIIa. Although the 296 position of nonfucosylated Fc interacts with Fc $\gamma$ RIIIa, its contribution is thought to be limited because the additional binding mode via the receptor's *N*-glycan, corresponding to Asn-162 of Fc $\gamma$ RIIIa [24, 25], is not involved in Fc $\gamma$ RIIIa binding. In their fucosylated forms, Tyr-296 mutants, with the exception of Y296P, showed improved Fc binding affinity for Fc $\gamma$ RIIIa. The inhibitory effects of Tyr-296 on Fc $\gamma$ RIIIa binding were thought to be caused by intramolecular contacts with Fc core fucose [45] and reduced by the Tyr-296 mutation, creating additional interactions with Lys-128 and Ser-129, or Phe-132 and Arg-134 of Fc $\gamma$ RIIIa.

Taken together, our data showed that the Y296W mutant had a unique Fc $\gamma$ R-binding profile compared with those of the other mutants, with improved binding for Fc $\gamma$ RIIIa-158F (V), Fc $\gamma$ RIIIb, and Fc $\gamma$ RIIIa-HR, irrespective of the Fc core fucosylation. Moreover, binding for Fc $\gamma$ RI was comparable to that of the wild-type antibody. In terms of the biological significance of Y296W, the nonfucosylated form retained maximal ADCC activity. However, other activities, such as binding to the inhibitory receptor Fc $\gamma$ RIIb [47], Fc $\gamma$ R-mediated antibody-dependent cell-mediated phagocytosis (ADCP), ROS/cytokine production, antigen presentation [48], and neonatal Fc receptor-mediated pharmacokinetics [49], should also be evaluated in future studies in order to determine the potential for nonfucosylated Y296W to serve as a therapeutic antibody.

In summary, this study demonstrated the biological importance of human IgG1-Fc Tyr-296 for interactions with various Fc $\gamma$ Rs by protein engineering and X-ray structural analysis. Additionally, the unique binding profile of the Y296W mutant to Fc $\gamma$ Rs was identified as a potential format for ADCC-based therapeutic antibodies. Our results provide new information on Fc $\gamma$ R-mediated antibody function and offer new clues for designing and engineering therapeutic antibodies with improved efficacy.

## Accession Numbers

The coordinate and structural factors of the crystal structure of the IgG1-Fc-Y296W/shFc $\gamma$ RIIIa complex have been deposited in the Protein Data Bank under accession number 5BW7.

## Supporting Information

**S1 Fig. Reducing SDS-PAGE of the anti-CD20 IgG1 rituximab variants digested by PNGaseF.** The fucosylated and nonfucosylated anti-CD20 IgG1 variants that were digested by PNGaseF were subjected to reducing 5–20% SDS-PAGE analyses. Lane M: molecular mass marker, lane 1: fucosylated Y296P without digestion, lane 2: fucosylated Y296P with digestion, lane 3: fucosylated wild-type without digestion, lane 4: fucosylated wild-type with digestion, lane 5: nonfucosylated Y296P without digestion, lane 6: nonfucosylated Y296P with digestion, lane 7: nonfucosylated wild-type without digestion, lane 8: nonfucosylated wild-type with digestion.

(TIF)

**S2 Fig. Antigen binding activity of purified anti-CD20 IgG1 rituximab variants to CD20<sup>+</sup> B-cell lymphoma cell line Raji cells.** Rituximab variants binding to Raji cells were measured by flow cytometry. Cells were stained with 1  $\mu\text{g}/\text{mL}$  anti-CD20 IgG1 rituximab variants (filled histograms) or staining buffer alone (blank histograms) at 4°C for 30 min, followed by staining with a detecting antibody (FITC-conjugated anti-human IgG antibody) at 4°C for 30 min.

(TIF)

**S3 Fig. Close-up view of the interaction interface between IgG1-Fc Y296W and shFc $\gamma$ RIIIa.** The  $F_0$ - $F_c$  electron density map of *N*-glycans, Trp-296 (IgG1-Fc chain A), and Lys-128 (Fc $\gamma$ RIIIa) contoured at 1.5  $\sigma$ .

(TIF)

## Acknowledgments

We thank Ms. Kiyomi Senda and Ms. Kumiko Hattori (Nagoya City University) for their help in the preparation of IgG1-Fc-Y296W and shFc $\gamma$ RIIIa for the crystallographic analysis and the beamline staff of NW12A at the Photon Factory, High Energy Accelerator Research Organization (KEK), Tsukuba, Japan (Proposals 2011G570 and 2013G188) for providing the data collection facilities and support.

## Author Contributions

Conceived and designed the experiments: YI HY TS MS-K MS KK SI. Performed the experiments: YI HY TS. Analyzed the data: YI HY TS KK SI. Contributed reagents/materials/analysis tools: YI HY TS MS-K KM KK SI. Wrote the paper: YI HY TS KM KK SI.

## References

1. Sheridan C. First integrin inhibitor since Tysabri nears approval for IBD. *Nat Biotechnol.* 2014; 32(3):205–7. doi: [10.1038/nbt0314-205](https://doi.org/10.1038/nbt0314-205) PMID: [24727756](https://pubmed.ncbi.nlm.nih.gov/24727756/)
2. Webster RM. The immune checkpoint inhibitors: where are we now? *Nat Rev Drug Discov.* 2014; 13(12):883–4. doi: [10.1038/nrd4476](https://doi.org/10.1038/nrd4476) PMID: [25345674](https://pubmed.ncbi.nlm.nih.gov/25345674/)
3. Weiner GJ. Rituximab: mechanism of action. *Semin Hematol.* 2010; 47(2):115–23. doi: [10.1053/j.seminhematol.2010.01.011](https://doi.org/10.1053/j.seminhematol.2010.01.011) PMID: [20350658](https://pubmed.ncbi.nlm.nih.gov/20350658/)
4. Hatjiharissi E, Xu L, Santos DD, Hunter ZR, Ciccarelli BT, Verselis S, et al. Increased natural killer cell expression of CD16, augmented binding and ADCC activity to rituximab among individuals expressing the Fc $\{\gamma\}$ RIIIa-158 V/V and V/F polymorphism. *Blood.* 2007; 110(7):2561–4. PMID: [17475906](https://pubmed.ncbi.nlm.nih.gov/17475906/)
5. Weng WK, Levy R. Two immunoglobulin G fragment C receptor polymorphisms independently predict response to rituximab in patients with follicular lymphoma. *J Clin Oncol.* 2003; 21(21):3940–7. PMID: [12975461](https://pubmed.ncbi.nlm.nih.gov/12975461/)
6. Hudis CA. Trastuzumab—mechanism of action and use in clinical practice. *N Engl J Med.* 2007; 357(1):39–51. PMID: [17611206](https://pubmed.ncbi.nlm.nih.gov/17611206/)

7. Musolino A, Naldi N, Bortesi B, Pezzuolo D, Capelletti M, Missale G, et al. Immunoglobulin G fragment C receptor polymorphisms and clinical efficacy of trastuzumab-based therapy in patients with HER-2/neu-positive metastatic breast cancer. *J Clin Oncol*. 2008; 26(11):1789–96. doi: [10.1200/JCO.2007.14.8957](https://doi.org/10.1200/JCO.2007.14.8957) PMID: [18347005](https://pubmed.ncbi.nlm.nih.gov/18347005/)
8. Bibeau F, Lopez-Crapez E, Di Fiore F, Thezenas S, Ychou M, Blanchard F, et al. Impact of Fc{gamma}RIIIa-Fc{gamma}RIIIa polymorphisms and KRAS mutations on the clinical outcome of patients with metastatic colorectal cancer treated with cetuximab plus irinotecan. *J Clin Oncol*. 2009; 27(7):1122–9. doi: [10.1200/JCO.2008.18.0463](https://doi.org/10.1200/JCO.2008.18.0463) PMID: [19164213](https://pubmed.ncbi.nlm.nih.gov/19164213/)
9. Zhang W, Gordon M, Schultheis AM, Yang DY, Nagashima F, Azuma M, et al. FCGR2A and FCGR3A polymorphisms associated with clinical outcome of epidermal growth factor receptor expressing metastatic colorectal cancer patients treated with single-agent cetuximab. *J Clin Oncol*. 2007; 25(24):3712–8. PMID: [17704420](https://pubmed.ncbi.nlm.nih.gov/17704420/)
10. Tao MH, Morrison SL. Studies of aglycosylated chimeric mouse-human IgG. Role of carbohydrate in the structure and effector functions mediated by the human IgG constant region. *J Immunol* (Baltimore, Md: 1950). 1989; 143(8):2595–601.
11. Wright A, Morrison SL. Effect of glycosylation on antibody function: implications for genetic engineering. *Trends Biotechnol*. 1997; 15(1):26–32. PMID: [9032990](https://pubmed.ncbi.nlm.nih.gov/9032990/)
12. Jefferis R. Glycosylation as a strategy to improve antibody-based therapeutics. *Nat Rev Drug Discov*. 2009; 8(3):226–34. doi: [10.1038/nrd2804](https://doi.org/10.1038/nrd2804) PMID: [19247305](https://pubmed.ncbi.nlm.nih.gov/19247305/)
13. Yamaguchi Y, Nishimura M, Nagano M, Yagi H, Sasakawa H, Uchida K, et al. Glycoform-dependent conformational alteration of the Fc region of human immunoglobulin G1 as revealed by NMR spectroscopy. *Biochim Biophys Acta*. 2006; 1760(4):693–700. PMID: [16343775](https://pubmed.ncbi.nlm.nih.gov/16343775/)
14. Yamaguchi Y, Takahashi N, Kato K. Molecular interactions: antibody structures. In: Kamerling JP, editor. *Comprehensive Glycoscience*, Oxford: Elsevier; 2007. pp. 745–763.
15. Shinkawa T, Nakamura K, Yamane N, Shoji-Hosaka E, Kanda Y, Sakurada M, et al. The absence of fucose but not the presence of galactose or bisecting N-acetylglucosamine of human IgG1 complex-type oligosaccharides shows the critical role of enhancing antibody-dependent cellular cytotoxicity. *J Biol Chem*. 2003; 278(5):3466–73. PMID: [12427744](https://pubmed.ncbi.nlm.nih.gov/12427744/)
16. Niwa R, Shoji-Hosaka E, Sakurada M, Shinkawa T, Uchida K, Nakamura K, et al. Defucosylated chimeric anti-CC chemokine receptor 4 IgG1 with enhanced antibody-dependent cellular cytotoxicity shows potent therapeutic activity to T-cell leukemia and lymphoma. *Cancer Res*. 2004; 64(6):2127–33. PMID: [15026353](https://pubmed.ncbi.nlm.nih.gov/15026353/)
17. Niwa R, Hatanaka S, Shoji-Hosaka E, Sakurada M, Kobayashi Y, Uehara A, et al. Enhancement of the antibody-dependent cellular cytotoxicity of low-fucose IgG1 is independent of Fc{gamma}RIIIa functional polymorphism. *Clin Cancer Res*. 2004; 10(18 Pt 1):6248–55. PMID: [15448014](https://pubmed.ncbi.nlm.nih.gov/15448014/)
18. Okazaki A, Shoji-Hosaka E, Nakamura K, Wakitani M, Uchida K, Kakita S, et al. Fucose depletion from human IgG1 oligosaccharide enhances binding enthalpy and association rate between IgG1 and Fc{gamma}RIIIa. *J Mol Biol*. 2004; 336(5):1239–49. PMID: [15037082](https://pubmed.ncbi.nlm.nih.gov/15037082/)
19. Niwa R, Natsume A, Uehara A, Wakitani M, Iida S, Uchida K, et al. IgG subclass-independent improvement of antibody-dependent cellular cytotoxicity by fucose removal from Asn297-linked oligosaccharides. *J Immunol Methods*. 2005; 306(1–2):151–60. PMID: [16219319](https://pubmed.ncbi.nlm.nih.gov/16219319/)
20. Kubota T, Niwa R, Satoh M, Akinaga S, Shitara K, Hanai N. Engineered therapeutic antibodies with improved effector functions. *Cancer Sci* 2009; 100(9):1566–72. doi: [10.1111/j.1349-7006.2009.01222.x](https://doi.org/10.1111/j.1349-7006.2009.01222.x) PMID: [19538497](https://pubmed.ncbi.nlm.nih.gov/19538497/)
21. Yamane-Ohnuki N, Satoh M. Production of therapeutic antibodies with controlled fucosylation. *mAbs*. 2009; 1(3):230–6. PMID: [20065644](https://pubmed.ncbi.nlm.nih.gov/20065644/)
22. Beck A, Reichert JM. Marketing approval of mogamulizumab: a triumph for glyco-engineering. *MAbs*. 2012; 4(4):419–25. doi: [10.4161/mabs.20996](https://doi.org/10.4161/mabs.20996) PMID: [22699226](https://pubmed.ncbi.nlm.nih.gov/22699226/)
23. Lisa A et al February 2014 Vol 7, No 1, Special Issue ASH 2013 Players' Perspectives in Oncology—Drug Update
24. Mizushima T, Yagi H, Takemoto E, Shibata-Koyama M, Isoda Y, Iida S, et al. Structural basis for improved efficacy of therapeutic antibodies on defucosylation of their Fc glycans. *Genes Cells*. 2011; 16(11):1071–80. doi: [10.1111/j.1365-2443.2011.01552.x](https://doi.org/10.1111/j.1365-2443.2011.01552.x) PMID: [22023369](https://pubmed.ncbi.nlm.nih.gov/22023369/)
25. Ferrara C, Grau S, Jager C, Sondermann P, Brunker P, Waldhauer I, et al. Unique carbohydrate-carbohydrate interactions are required for high affinity binding between Fc{gamma}RIII and antibodies lacking core fucose. *Proc Natl Acad Sci USA*. 2011; 108(31):12669–74. doi: [10.1073/pnas.1108455108](https://doi.org/10.1073/pnas.1108455108) PMID: [21768335](https://pubmed.ncbi.nlm.nih.gov/21768335/)

26. Urlaub G, Mitchell PJ, Kas E, Chasin LA, Funanage VL, Myoda TT, et al. Effect of gamma rays at the dihydrofolate reductaselocus: deletions and inversions. *Somat Cell Mol Genet*. 1986; 12:555–566. PMID: [3024331](#)
27. Yamane-Ohnuki N, Kinoshita S, Inoue-Urakubo M, Kusunoki M, Iida S, Nakano R, et al. Establishment of FUT8 knockout Chinese hamster ovary cells: an ideal host cell line for producing completely defucosylated antibodies with enhanced antibody-dependent cellular cytotoxicity. *Biotechnol Bioeng*. 2004; 87(5):614–22. PMID: [15352059](#)
28. Matsumiya S, Yamaguchi Y, Saito J, Nagano M, Sasakawa H, Otaki S, et al. Structural comparison of fucosylated and nonfucosylated Fc fragments of human immunoglobulin G1. *J Mol Biol*. 2007; 368(3):767–79. PMID: [17368483](#)
29. Iida S, Misaka H, Inoue M, Shibata M, Nakano R, Yamane-Ohnuki N, et al. Nonfucosylated therapeutic IgG1 antibody can evade the inhibitory effect of serum immunoglobulin G on antibody-dependent cellular cytotoxicity through its high binding to FcγRIIIa. *Clin Cancer Res*. 2006; 12(9):2879–87. PMID: [16675584](#)
30. Kanda Y, Yamada T, Mori K, Okazaki A, Inoue M, Kitajima-Miyama K, et al. Comparison of biological activity among nonfucosylated therapeutic IgG1 antibodies with three different N-linked Fc oligosaccharides: the high-mannose, hybrid, and complex types. *Glycobiology*. 2007; 17(1):104–18. PMID: [17012310](#)
31. Shibata-Koyama M, Iida S, Okazaki A, Mori K, Kitajima-Miyama K, Saitou S, et al. The N-linked oligosaccharide at Fc gamma RIIIa Asn-45: an inhibitory element for high Fc gamma RIIIa binding affinity to IgG glycoforms lacking core fucosylation. *Glycobiology*. 2009; 19(2):126–34. doi: [10.1093/glycob/cwn110](#) PMID: [18952826](#)
32. Shibata-Koyama M, Iida S, Misaka H, Mori K, Yano K, Shitara K, et al. Nonfucosylated rituximab potentiates human neutrophil phagocytosis through its high binding for FcγRIIIb and MHC class II expression on the phagocytotic neutrophils. *Exp Hematol*. 2009; 37(3):309–21. doi: [10.1016/j.exphem.2008.11.006](#) PMID: [19218011](#)
33. Masuda K, Kubota T, Kaneko E, Iida S, Wakitani M, Kobayashi-Natsume Y, et al. Enhanced binding affinity for FcγRIIIa of fucose-negative antibody is sufficient to induce maximal antibody-dependent cellular cytotoxicity. *Mol Immunol*. 2007; 44(12):3122–31. PMID: [17379311](#)
34. Otwinowski Z, Minor W. Processing of X-ray diffraction data collected in oscillation mode. *Meth Enzymol* 1997; 276: 307–326.
35. Vagin A, Teplyakov A MOLREP: An automated program for molecular replacement. *J Appl Crystallogr* 1997; 30: 1022–1025.
36. Emsley P, Lohkamp B, Scott WG, Cowtan K. Features and development of Coot. *Acta Crystallogr D Biol Crystallogr*. 2010; 66(Pt 4):486–501. doi: [10.1107/S0907444910007493](#) PMID: [20383002](#)
37. Murshudov GN, Vagin AA, Dodson EJ. Refinement of macromolecular structures by the maximum-likelihood method. *Crystallogr D Biol Crystallogr*. 1997; 53(Pt 3):240–55.
38. Lovell SC, Davis IW, Arendall WB 3rd, de Bakker PI, Word JM, Prisant MG, et al. Structure validation by Cα geometry: phi,psi and Cβ deviation. *Proteins*. 2003; 50(3):437–50. PMID: [12557186](#)
39. Edberg JC, Kimberly RP. Cell type-specific glycoforms of FcγRIIIa (CD16). *J Immunol*. 1997; 159:3849–3857 PMID: [9378972](#)
40. Kawasaki N, Okumoto T, Yamaguchi Y, Takahashi N, Fridman WH, Sautes-Fridman C, et al. Site-specific classification of N-linked oligosaccharides of the extracellular regions of Fcγ receptor IIIb expressed in baby hamster kidney cells. *J Glycomics Lipidomics*. 2014; 4:2
41. Elliott S, Chang D, Delorme E, Eris T, Lorenzini T. Structural requirements for additional N-linked carbohydrate on recombinant human erythropoietin. *J Biol Chem*. 2004; 279:16854–16862 PMID: [14757769](#)
42. Mimura Y, Sondermann P, Ghirlando R, Lund J, Young SP, Goodall M, et al. Role of oligosaccharide residues of IgG1-Fc in Fc gamma RIIb binding. *J Biol Chem*. 2001; 276(49):45539–47. PMID: [11567028](#)
43. Sarmay G, Lund J, Rozsnyay Z, Gergely J, Jefferis R. Mapping and comparison of the interaction sites on the Fc region of IgG responsible for triggering antibody dependent cellular cytotoxicity (ADCC) through different types of human Fc gamma receptor. *Mol Immunol*. 1992; 29(5):633–9. PMID: [1533898](#)
44. Lu J, Ellsworth JL, Hamacher N, Oak SW, Sun PD. Crystal structure of Fcγ receptor I and its implication in high affinity gamma-immunoglobulin binding. *J Biol Chem*. 2011; 286(47):40608–13. doi: [10.1074/jbc.M111.257550](#) PMID: [21965667](#)
45. Ramsland PA, Farrugia W, Bradford TM, Sardjono CT, Esparon S, Trist HM, et al. Structural basis for Fc gammaRIIIa recognition of human IgG and formation of inflammatory signaling complexes. *J Immunol*. 2011; 187(6):3208–17. doi: [10.4049/jimmunol.1101467](#) PMID: [21856937](#)



46. Shields RL, Lai J, Keck R, O'Connell LY, Hong K, Meng YG, et al. Lack of fucose on human IgG1 N-linked oligosaccharide improves binding to human Fcγ3R1 and antibody-dependent cellular toxicity. *J Biol Chem*. 2002; 277(30):26733–40. PMID: [11986321](#)
47. Clynes RA, Towers TL, Presta LG, Ravetch JV. Inhibitory Fc receptors modulate in vivo cytotoxicity against tumor targets. *Nature medicine*. 2000; 6(4):443–6. PMID: [10742152](#)
48. Nimmerjahn F, Ravetch JV. Fcγ receptors as regulators of immune responses. *Nat Rev Immunol*. 2008; 8(1):34–47. PMID: [18064051](#)
49. Rath T, Kuo TT, Baker K, Qiao SW, Kobayashi K, Yoshida M, et al. The immunologic functions of the neonatal Fc receptor for IgG. *J Clin Immunol*. 2013; 33 Suppl 1:S9–17. doi: [10.1007/s10875-012-9768-y](#) PMID: [22948741](#)
